# Supplementary material
Source: PubMed Central journal article supplement (PMC5690876)
Supplement: NIHMS910057-supplement-1.pdf [file NIHMS910057-supplement-1.pdf]

Figure 1A

Figure 2A

Figure 2B

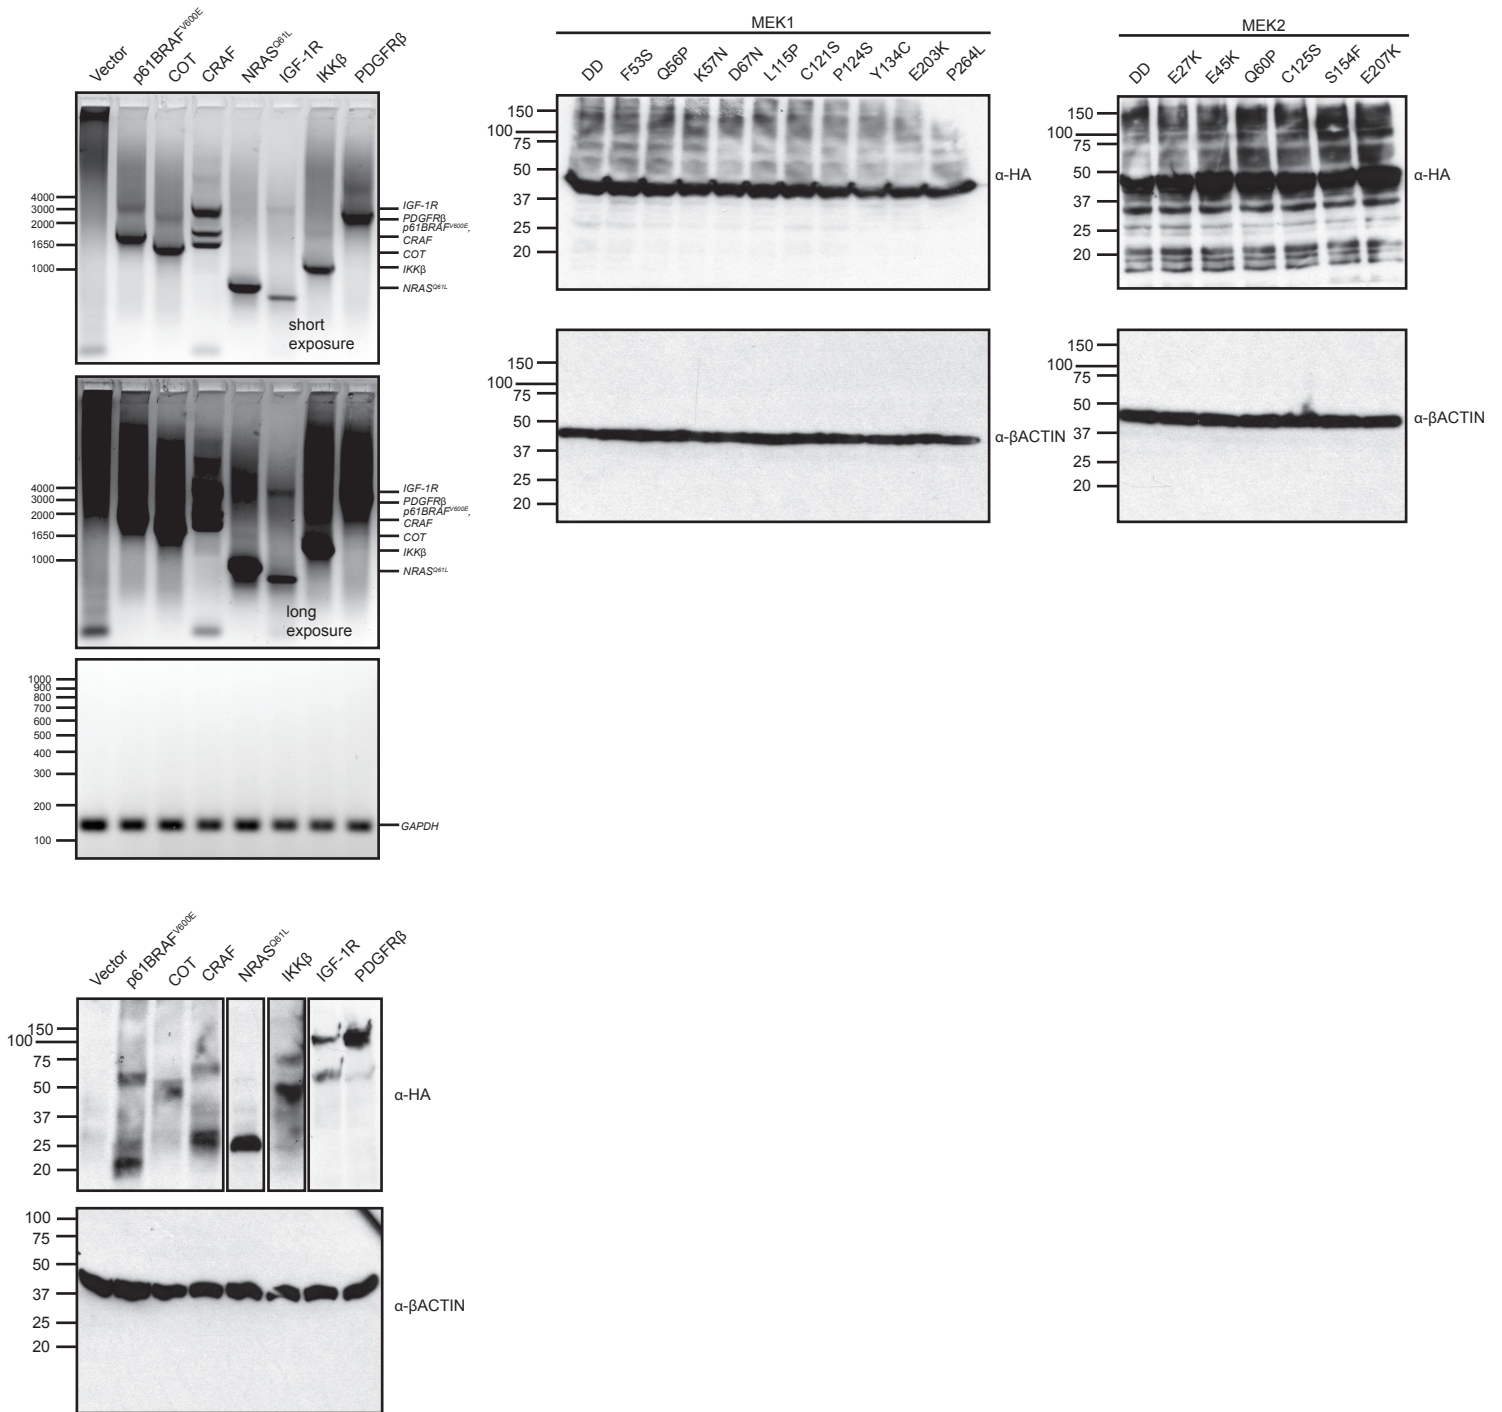

**Figure S1.** Related to Figures 1,2; Full-length RT-PCR detection of indicated mRNA as shown in Figure 1A or immunoblots of indicated proteins as shown in Figure 1A and Figure 2A,B. GAPDH and  $\beta$ ACTIN: loading control.

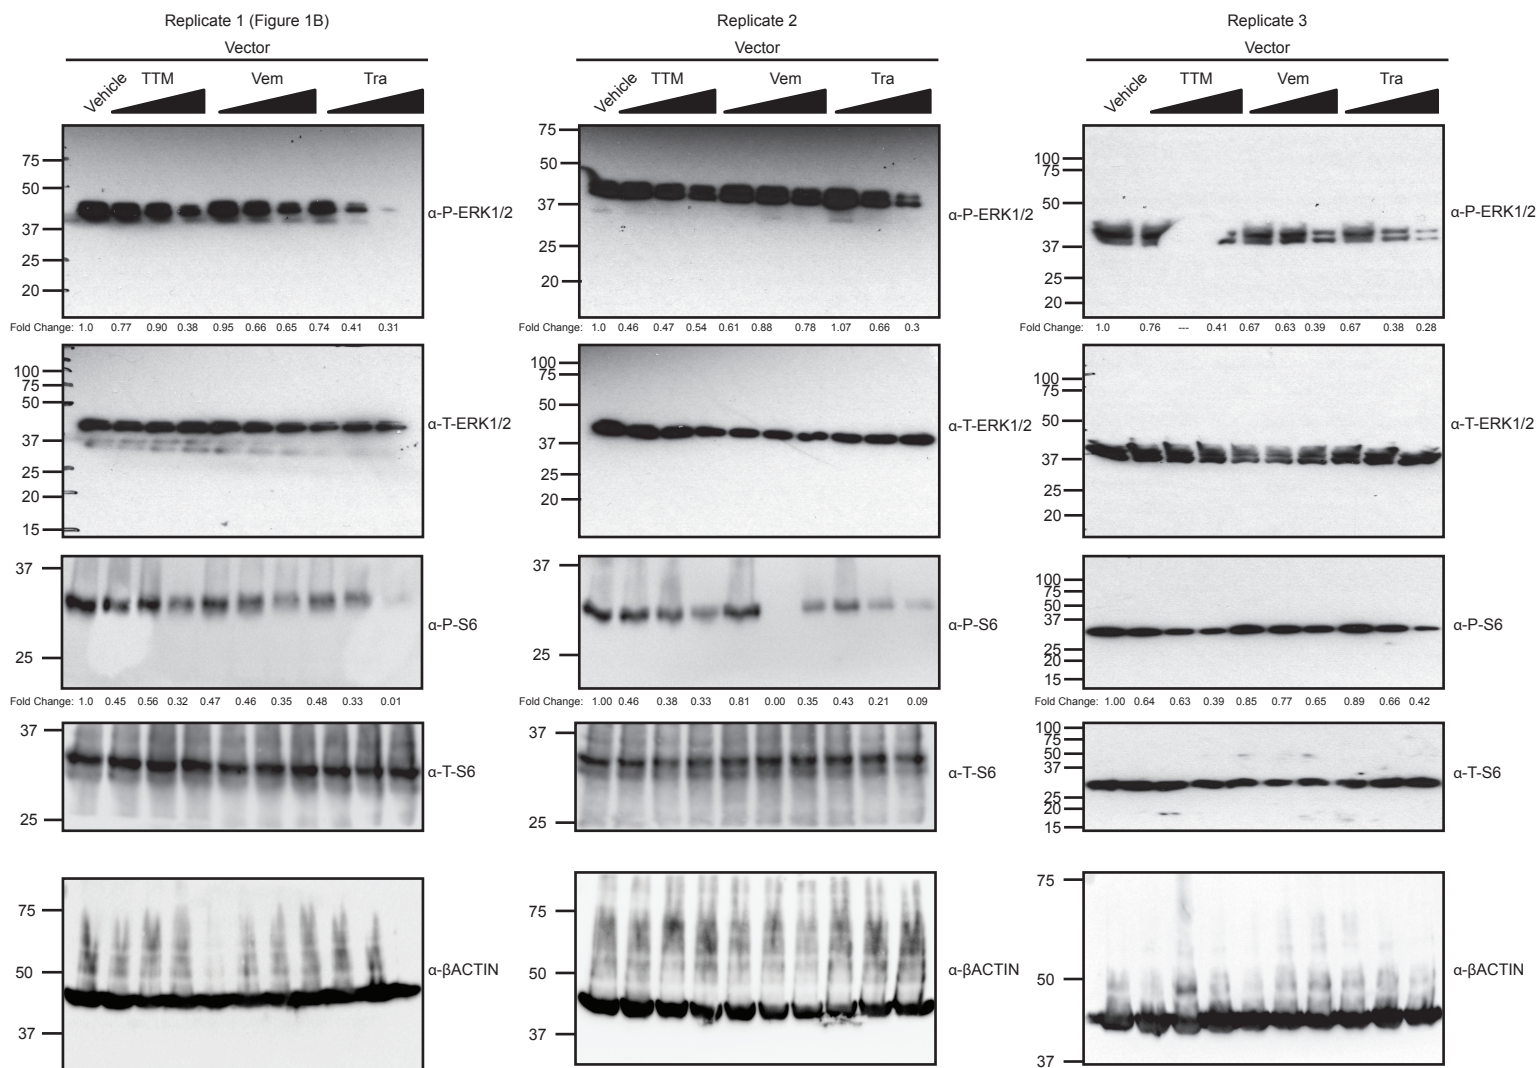

**Figure S2.** Related to Figure 1; Full length immunoblot shown in Figure 1B as well as two replicates (with quantification).



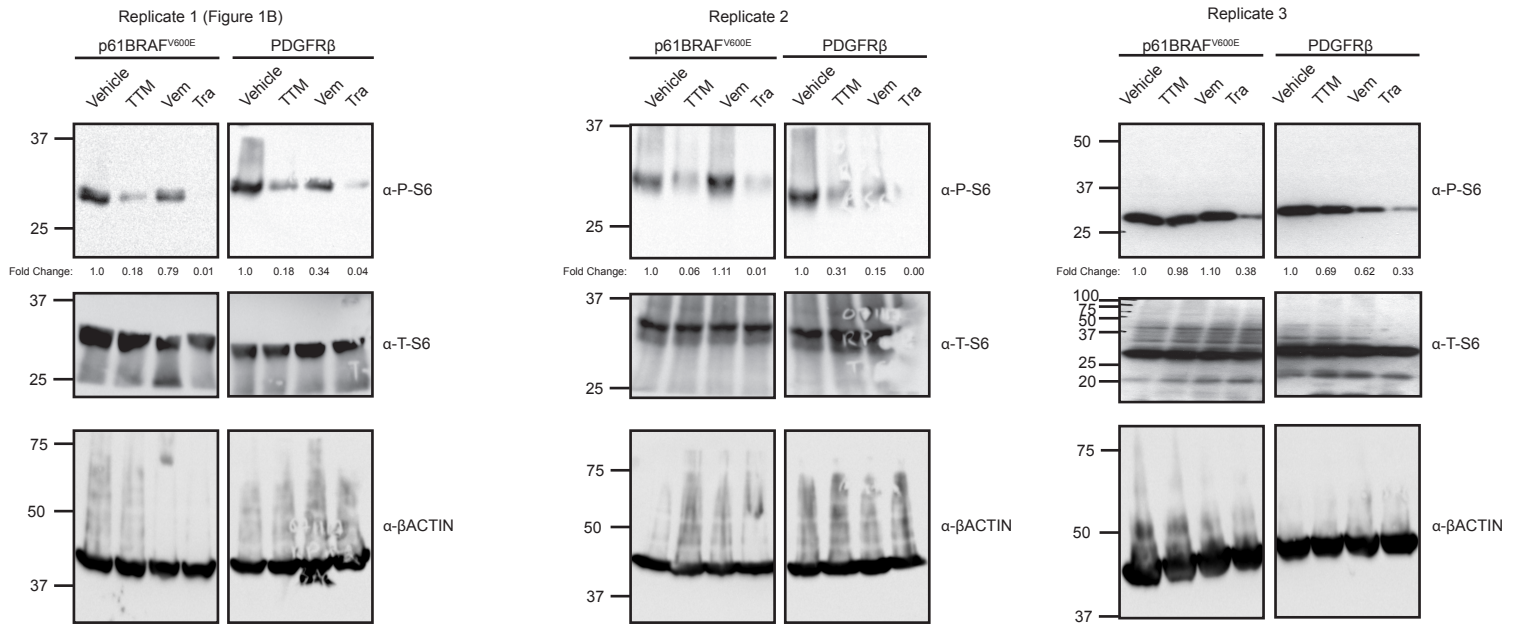

**Figure S3.** Related to Figure 1; Full length immunoblot shown in Figure 1B as well as two replicates (with quantification).

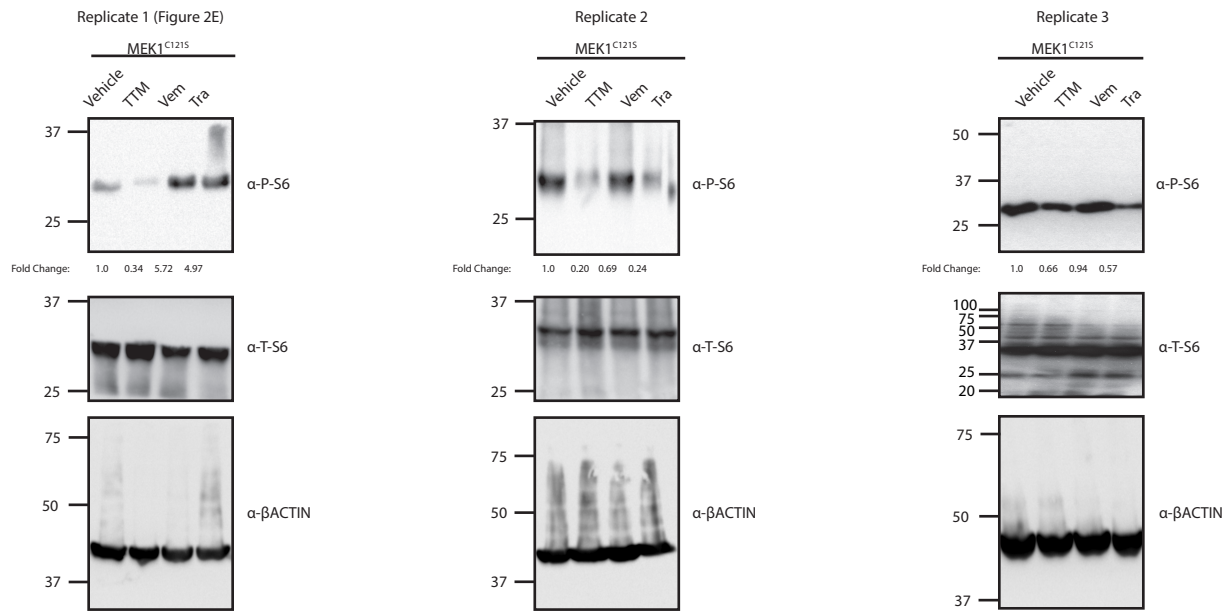

**Figure S4.** Related to Figure 2; Full length immunoblot shown in Figure 2E as well as two replicates (with quantification).

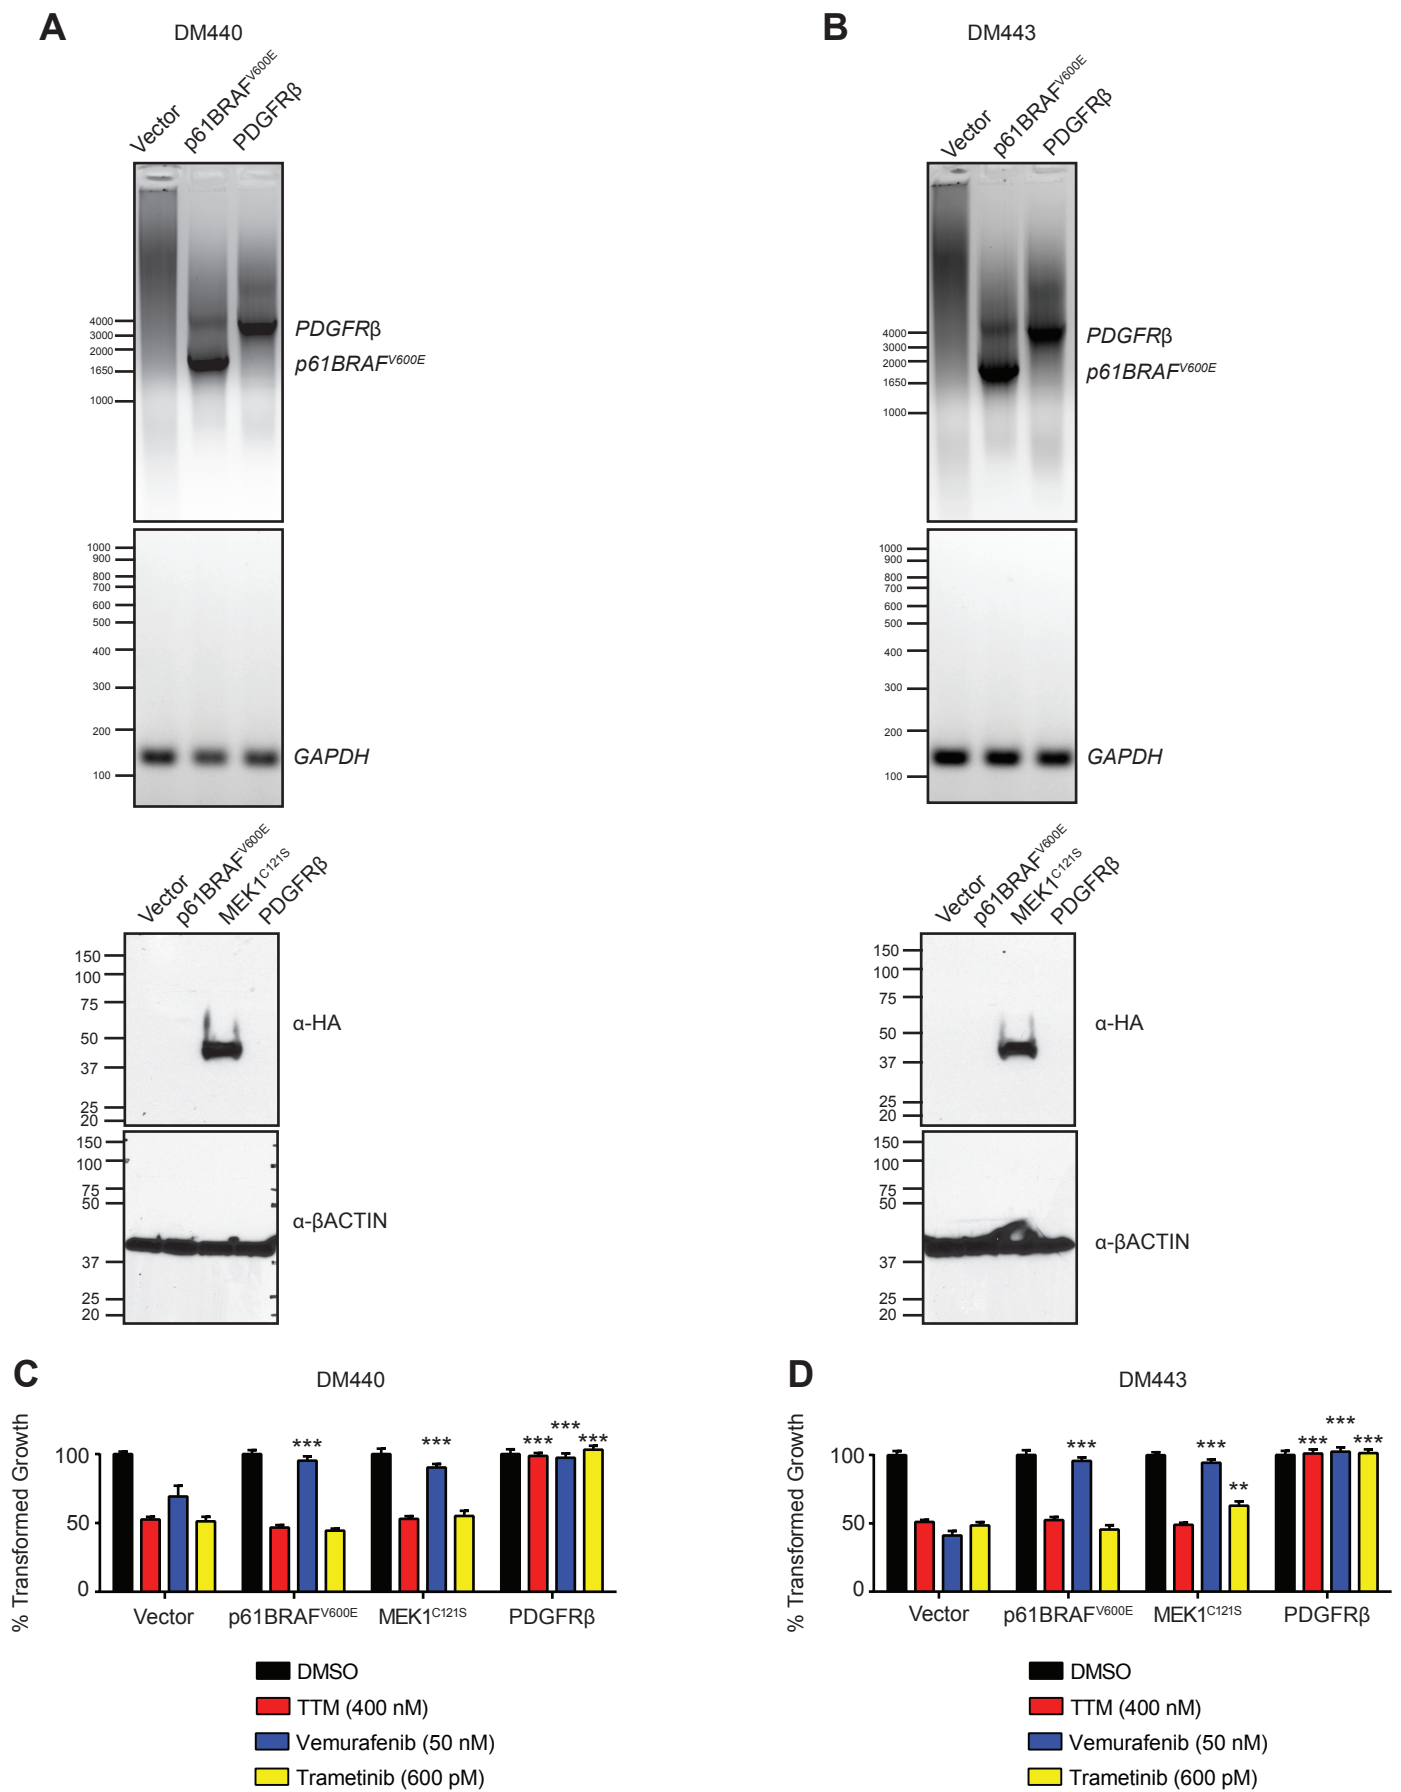

**Figure S5.** Related to Figures 1,2; **(A, B)** RT-PCR detection of ectopic HA-tagged p61BRAF<sup>V600E</sup> or PDGFRβ cDNAs or immunoblot detection of ectopic HA-tagged MEK1<sup>C121S</sup> in **(A)** DM440 or **(B)** DM443 cells. GAPDH and βACTIN: loading control. **(C, D)** % transformed growth expressed as the normalized % soft agar colony formation (mean ± s.e.m, triplicate samples, three experiments) of **(C)** DM440 or **(D)** DM443 cells stably expressing p61BRAF<sup>V600E</sup>, MEK1<sup>C121S</sup>, or PDGFRβ when treated with vehicle (black bar) or the IC50 doses of TTM (red bar), vemurafenib (blue bar), or trametinib (yellow bar). \*\*p<0.001 and \*\*\*p<0.0001 versus vector control cells treated with the same drug. Statistical analysis was performed with two-way Analysis of Variance (ANOVA) with a Bonferroni multiple comparisons post test to compare transformed growth of each cell line with vector control cells treated with the same drug.



**A**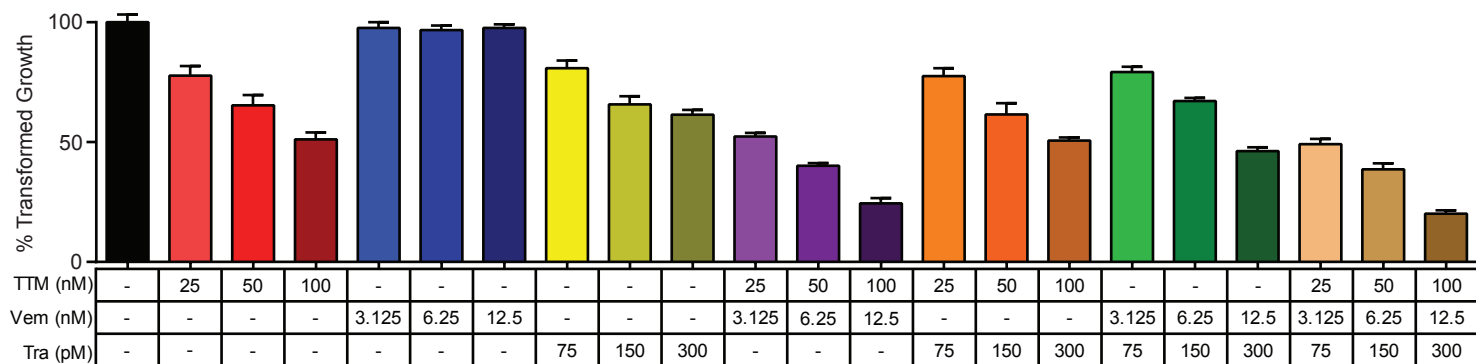**B**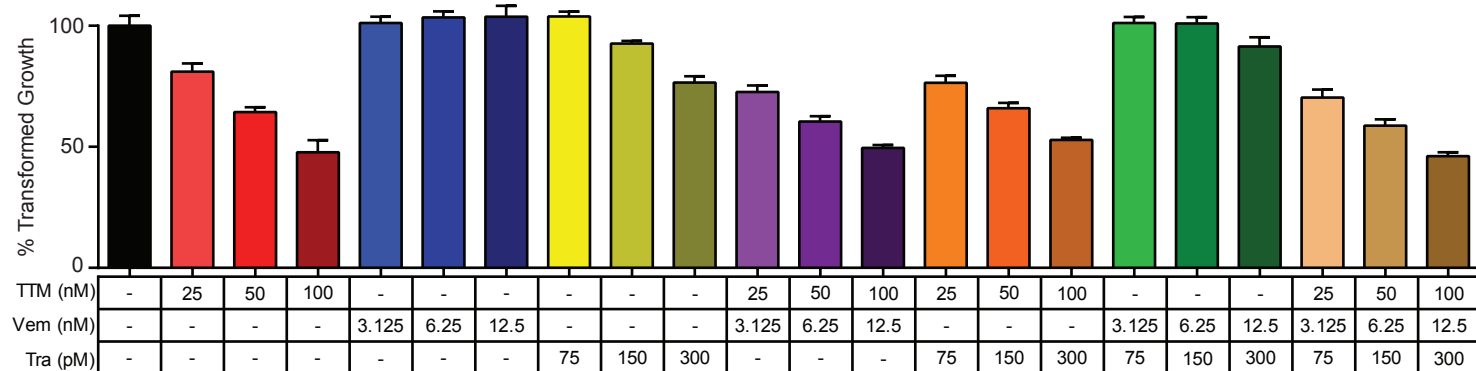**C**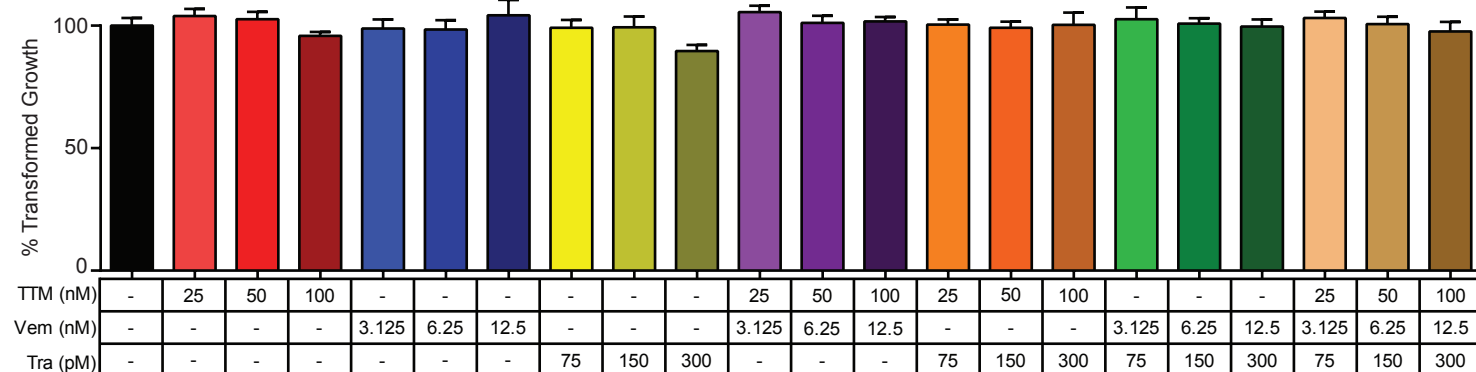

**Figure S6.** Related to Figure 3; **(A, B, C)** % transformed growth expressed as the normalized % soft agar colony formation (mean  $\pm$  s.e.m, triplicate samples, three experiments) of A375 cells stably infected to express **(A)** p61BRAF<sup>V600E</sup>, **(B)** MEK1<sup>C121S</sup>, or **(C)** PDGFR $\beta$  when treated with vehicle (black bar), TTM (red bars), vemurafenib (Vem, blue bars), trametinib (Tra, yellow bars), TTM and vemurafenib (TTM+Vem, purple bars), TTM and trametinib (TTM+Tra, orange bars), vemurafenib and trametinib (Vem+Tra, green bars), or TTM, vemurafenib, and trametinib (TTM+Vem+Tra, brown bars) at the indicated doses alone or in fixed-ratio combinations.

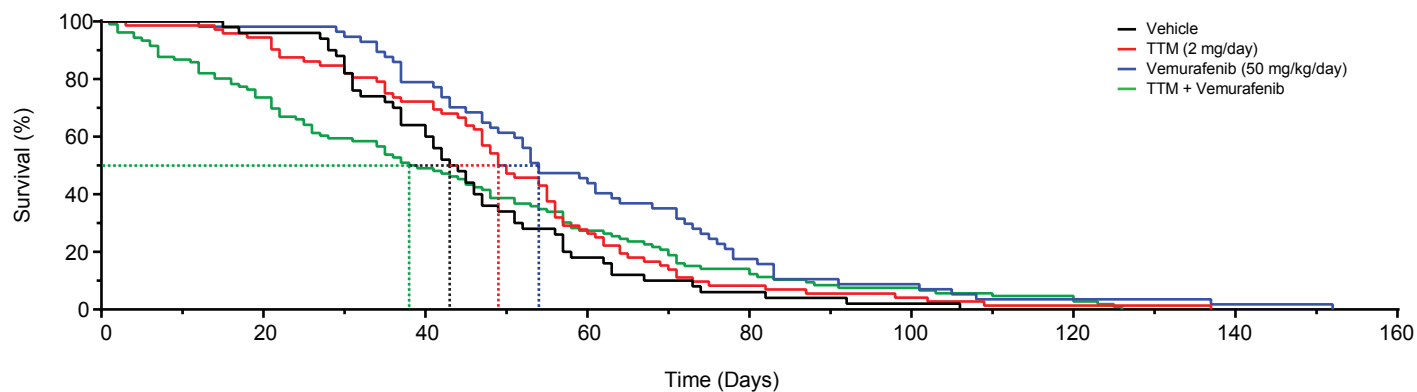

**Figure S7.** Related to Figure 5; uncensored Kaplan-Meier analysis of BPC mice orally treated daily with vehicle (solid black line,  $n=50$ , dotted line: 43.5 days median survival), TTM (solid red line,  $n=72$ , dotted line: 50 days median survival,  $p=0.14$  compared to vehicle), vemurafenib (solid blue line,  $n=57$ , dotted line: 54 days median survival,  $p=0.001$  compared to vehicle), or TTM and vemurafenib (solid green line,  $n=106$ , dotted line: 38.5 days median survival,  $p=0.61$  compared to vehicle) from the appearance of a pigmented lesion of all mice that reached endpoint for any reason. Statistical analysis was performed with a Mantel-Cox log-rank method to compare each group to vehicle-treated control mice in a pairwise manner.

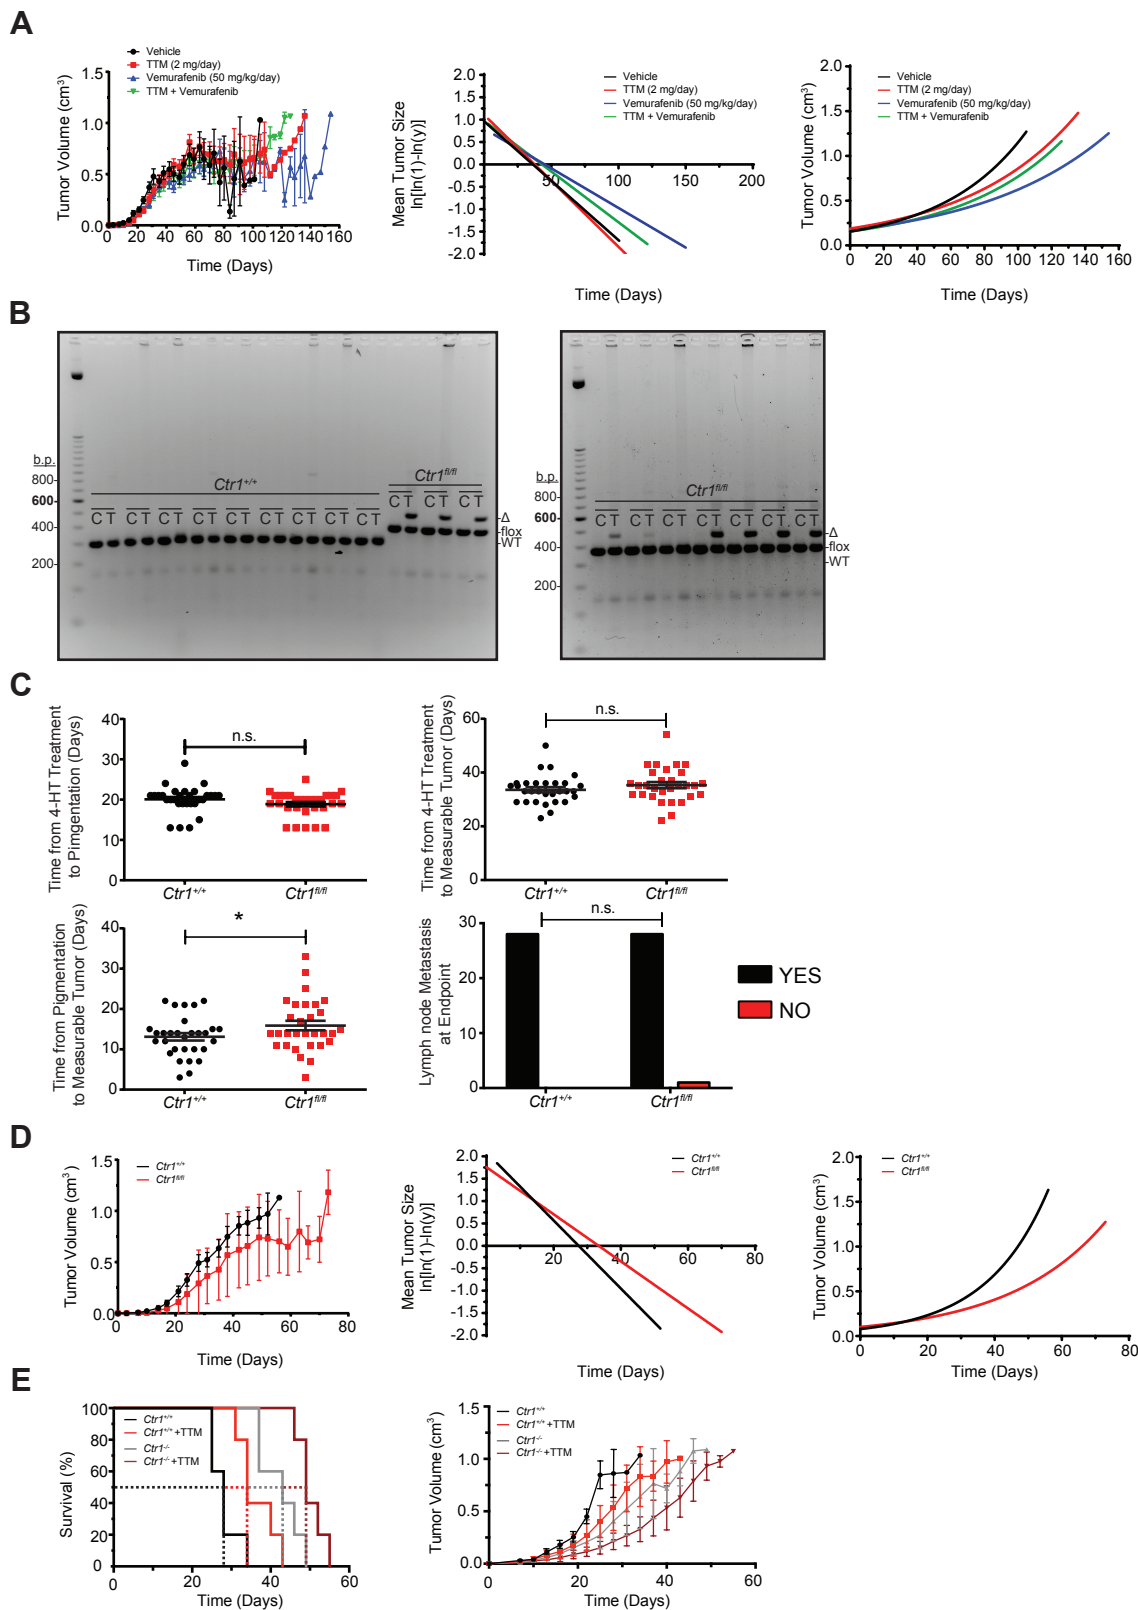

**Figure S8.** Related to Figures 5,7; growth kinetics, Gompertz transformation, and exponential growth curves for tumors from (A) BPC mice treated with vehicle (black line,  $n=48$ ), TTM (red line,  $n=36$ ), vemurafenib (blue line,  $n=51$ ), or TTM and vemurafenib (green line,  $n=51$ ) or (D)  $Ctrl^{+/+}$  (black line,  $n=30$ ) or  $Ctrl^{fl/fl}$  (red line,  $n=30$ ) BPC mice. (B) PCR detection of wildtype (WT), conditional (flox), and the recombined null ( $\Delta$ ) *Ctrl* alleles from  $Ctrl^{+/+}$  ( $n=9$ ) and  $Ctrl^{fl/fl}$  ( $n=10$ ) BPC mice from matched normal control tail samples (C) and tumor tissue (T). Left: ladder (b.p., base pairs) (C) Scatter dot plot or grouped bar graph of time from 4-HT treatment to appearance of pigmentation, time from 4-HT treatment to appearance of measurable tumor, time from pigmentation to appearance of measurable tumor, and presence of visible lymph node metastasis at endpoint for  $Ctrl^{+/+}$  ( $n=30$ ) and  $Ctrl^{fl/fl}$  ( $n=30$ ) BPC mice. \* $p < 0.05$ ; n.s., not significant. Statistical analysis was performed with a Student's *t*-test. (E) Kaplan–Meier analysis (left) of percentage of mice with tumor volume at least  $1.0 \text{ cm}^3$  versus time (right) when injected with  $BRAF^{V600E}$ -transformed  $Ctrl^{+/+}$  MEFs treated with vehicle (solid black line,  $n=5$ , dotted line: 28 days median survival) or TTM (solid red line,  $n=5$ , dotted line: 34 days median survival,  $p=0.0249$  compared to vehicle) or  $BRAF^{V600E}$ -transformed  $Ctrl^{-/-}$  MEFs treated with vehicle (solid grey line,  $n=5$ , dotted line: 43 days,  $p=0.0019$  compared to  $Ctrl^{+/+}$  vehicle) or TTM (solid dark red line,  $n=5$ , dotted line: 49 days,  $p=0.0288$  compared to  $Ctrl^{-/-}$  vehicle). Statistical analysis was performed with a Mantel-Cox log-rank method to compare the indicated groups in a pairwise manner.
